# Supplementary material for: “i'd exercise caution, but be discreet about it”: Comparing undergraduates’ stigma toward peers with criminal records and mental health disorders
Source: Research Square preprint supplement (doi:10.21203/rs.3.rs-7510179/v1), 2025-09-23
Supplement: Supplementary file 1 [file e6724135451f0915393c6117.docx]

Appendix A: Principal Component Analysis loadings for SAS

| **A.1: Initial** | | | |
| --- | --- | --- | --- |
|  | Loading | Uniqueness |
| Scholarship | .800 | .306 |
| Earns A | .766 | .413 |
| Newspaper | .709 | .497 |
| Meeting | .646 | .583 |
| Sexual Assault | -.569 | .676 |
| Test Scores | .531 | .718 |
| Car | .425 | .819 |
| Mentoring | .414 | .828 |
| Cheating |  | .937 |

| **A.2: Final** | | |
| --- | --- | --- |
|  | Loading | Uniqueness |
| Scholarship | .794 | .370 |
| Earns A | .770 | .408 |
| Newspaper | .716 | .487 |
| Meeting | .655 | .571 |
| Test Scores | .560 | .686 |
| Mentoring | .443 | .804 |
| Car | .437 | .809 |

| **Appendix B**: component scores for sentiment component | | |
| --- | --- | --- |
|  | Loading | Uniqueness |
| Tone | .784 | .386 |
| Social | .681 | .536 |
| Affect | .668 | .554 |

| **Appendix C**: Correlations among all self-report measures and the SAS and Sentiment component scores. | | | | | | | | | | | |
| --- | --- | --- | --- | --- | --- | --- | --- | --- | --- | --- | --- |
|  |  | **1** | **2** | **3** | **4** | **5** | **6** | **7** | **8** | **9** | **10** |
| **1** | **PQ+** | — |  |  |  |  |  |  |  |  |  |
| **2** | **NQ-** | -.263*** | — |  |  |  |  |  |  |  |  |
| **3** | **SD4** | -.027 | .378*** | — |  |  |  |  |  |  |  |
| **4** | **VSRWA** | .177** | .035 | .141* | — |  |  |  |  |  |  |
| **5** | **SINS** | .075 | -.189*** | -.324*** | -.048 | — |  |  |  |  |  |
| **6** | **SITES** | .306*** | -.197*** | -.036 | .040 | .179** | — |  |  |  |  |
| **7** | **SISES** | .290*** | -.015 | .257*** | .366*** | -.061 | .137* | — |  |  |  |
| **8** | **SRMH** | -.216*** | .036 | -.134* | -.349*** | -.002 | -.027 | -.655*** | — |  |  |
| **9** | **SAS** | .103 | -.087 | .067 | -.129* | .056 | .098 | -.024 | .015 | — |  |
| **10** | **Sentiment** | .133* | -.017 | .096 | .148** | -.057 | .032 | .205*** | -.139* | .311*** | — |
| *Note.* PQ+/NQ– = Positive Quality enhancement and Negative Quality minimization scales (respectively) of the KSE-G (see text); SD4 = Short Dark Tetrad; VSRWA = Very Short Right Wing Authoritarianism; SINS = Single Item Narcissism Scale; SITES = Single Item Trait Empathy Scale; SISES = Single Item Self-Esteem Scale; SRMH = Single-item Self-Reported Mental Health; SAS = Situational Attitude Scale component scores; Sentiment = sentiment analysis component scores * *p* < .05, ** *p* < .01, *** *p* < .001 | | | | | | | | | | | | |

| **Appendix D**: Full results of ANCOVA models with SAS and Sentiment as dependent variables, respectively. | | | | | |
| --- | --- | --- | --- | --- | --- |
|  | **SAS** | | **Sentiment** | | |
|  | ***F* (2, 271)** | ***ηp*²** | | ***F* (2, 271)** | ***ηp*²** | |
| **Group** | 91.68*** | .404 | | 45.54*** | .252 | |
|  |  |  | |  |  | |
| **PQ+** | 0.02 | <.001 | | 0.03 | <.001 | |
| **NQ-** | 1.17 | .004 | | 0.13 | <.001 | |
| **Light Triad** | 12.82*** | .045 | | 2.82 | .010 | |
| **SD4** | 1.97 | .007 | | 0.75 | .003 | |
| **VSRWA** | 4.12* | .015 | | 3.37 | .012 | |
| **SINS** | 0.78 | .003 | | 1.28 | .005 | |
| **SITES** | 0 | <.001 | | 0.12 | <.001 | |
| **SISE** | 1.9 | .007 | | 1.04 | .004 | |
| **SRMH** | 2.65 | .010 | | 0.37 | .001 | |
| **Psychiatric Dx.** | 0.87 | .003 | | 0 | <.001 | |
|  |  |  | |  |  | |
| **Type of Institution** |  |  | | 2.95 | .011 | |
| **Year** | 8.51** | .030 | | 0.57 | .002 | |
| **Full Time** | 1.79 | .007 | | 1.38 | .005 | |
|  |  |  | |  |  | |
| **Been incarcerated** | 0.56 | .002 | | 0.05 | <.001 | |
| **Known Other Incarcerated** |  |  | | 0.32 | .001 | |
| **Crime in Neighborhood** | 0.73 | .003 | | 0.09 | <.001 | |
| **Political Philosophy** | 1.63 | .006 | | 1.01 | .004 | |
| **Victimization** | 0.08 | <.001 | | 0.01 | <.001 | |
|  |  |  | |  |  | |
| **Age** | 0.91 | .003 | | 1.07 | .004 | |
| **Race** | 0.56 | .002 | | 1.72 | .006 | |
| **Gender** | 0.04 | <.001 | | 1.72 | .006 | |
| ***Notes***: PQ+/NQ– = Positive Quality enhancement and Negative Quality minimization scales (respectively) of the KSE-G (see text); SD4 = Short Dark Tetrad; VSRWA = Very Short Right Wing Authoritarianism; SINS = Single Item Narcissism Scale; SITES = Single Item Trait Empathy Scale; SISES = Single Item Self-Esteem Scale; SRMH = Single-item Self-Reported Mental Health; Psych. Dx = Percentage reporting a psychiatric diagnosis; Been incarcerated = specified as having been in jail or prison for more than one month; Known incarcerated = How many close known others who were incarcerated; Political Philosophy = sliding scale of conservative through liberal; Victimization = Self or close other being victims of violent or non-violent crimes;  **p* < .05, ***p*< .01, ****p* < .001 | | | | | | |

**Appendix E:**

Results of 3 (condition: control, mental illness, criminal) x 3 (prompt: society, personal thoughts, personal behaviors) ANOVA for the sentiment component. Note that, to do this analysis, the responses had to be disaggregated by prompt and evaluated individually, whereas the ratings in-text were combined into one rating. Therefore the raw values are not entirely analogous to the ones in the main text. For ease of presentation, there were no covariates in this analysis.

|  | F (2, 930) | *ηp*² |
| --- | --- | --- |
| Condition | 60.108*** | 0.114 |
| Prompt | 11.352*** | 0.024 |
| Condition X Prompt | 6.084*** | 0.026 |

| **Condition** | **Prompt** |  | **Condition** | **Prompt** | **T-value** | **Cohen's d** |
| --- | --- | --- | --- | --- | --- | --- |
| Control | Society | - | Control | Thoughts | -2.07 | -0.308 |
|  |  | - | Control | Treatment | -6.18*** | -0.921 |
|  |  | - | Criminal | Society | 3.07 | 0.438 |
|  |  | - | Criminal | Thoughts | 4.28*** | 0.610 |
|  |  | - | Criminal | Treatment | 2.84 | 0.405 |
|  |  | - | Mental Illness | Society | -0.04 | -0.005 |
|  |  | - | Mental Illness | Thoughts | 0.31 | 0.044 |
|  |  | - | Mental Illness | Treatment | -0.62 | -0.087 |
|  | Thoughts | - | Control | Treatment | -4.11** | -0.613 |
|  |  | - | Criminal | Society | 5.24*** | -0.746 |
|  |  | - | Criminal | Thoughts | 6.45*** | 0.918 |
|  |  | - | Criminal | Treatment | 5.01*** | 0.713 |
|  |  | - | Mental Illness | Society | 2.15 | -0.303 |
|  |  | - | Mental Illness | Thoughts | 2.50 | 0.352 |
|  |  | - | Mental Illness | Treatment | 1.57 | 0.221 |
|  | Treatment | - | Criminal | Society | 9.54*** | -1.359 |
|  |  | - | Criminal | Thoughts | 10.75*** | -1.531 |
|  |  | - | Criminal | Treatment | 9.31*** | 1.326 |
|  |  | - | Mental Illness | Society | 6.49*** | -0.916 |
|  |  | - | Mental Illness | Thoughts | 6.84*** | -0.965 |
|  |  | - | Mental Illness | Treatment | 5.91*** | 0.834 |
| Criminal | Society | - | Criminal | Thoughts | 1.27 | 0.173 |
|  |  | - | Criminal | Treatment | -0.24 | -0.032 |
|  |  | - | Mental Illness | Society | -3.31* | -0.443 |
|  |  | - | Mental Illness | Thoughts | -2.94 | -0.394 |
|  |  | - | Mental Illness | Treatment | -3.92** | -0.525 |
|  | Thoughts | - | Criminal | Treatment | -1.51 | -0.205 |
|  |  | - | Mental Illness | Society | -4.59*** | 0.615 |
|  |  | - | Mental Illness | Thoughts | -4.23*** | -0.566 |
|  |  | - | Mental Illness | Treatment | -5.21*** | -0.697 |
|  | Treatment | - | Mental Illness | Society | -3.06 | 0.410 |
|  |  | - | Mental Illness | Thoughts | -2.70 | 0.361 |
|  |  | - | Mental Illness | Treatment | -3.68** | -0.492 |
| Mental Illness | Society | - | Mental Illness | Thoughts | 0.37 | 0.049 |
|  |  | - | Mental Illness | Treatment | -0.62 | -0.082 |
|  | Thoughts | - | Mental Illness | Treatment | -0.99 | -0.131 |
| *Note.* Comparisons are based on estimated marginal means; all *p*-values are Tukey-corrected; **p* < .05; ***p* < .01; *** *p* < .001 | | | | | | |

Appendix E (continued):
